# Supplementary material for: Unprecedented metal-ion metathesis in a metal–carboxylate chain-based metal–organic framework
Source: Royal Society of Chemistry journal article supplement (doi:10.1039/c3ce42214c), 2014-01-01
Supplement: c3ce42214c.pdf [file c3ce42214c.pdf]

## **Unprecedented metal-ion metathesis in a metal-carboxylate chains-based metal-organic framework**

**Yan-Fei Niu,<sup>a</sup> Wen Zhao,<sup>a</sup> Jie Han,<sup>\*b</sup> GeTian<sup>c</sup> and Xiao-Li Zhao<sup>\*a</sup>**

*<sup>a</sup> Shanghai Key Laboratory of Green Chemistry and Chemical Processes, Department of Chemistry, East China Normal University, 3663 North Zhongshan Road, Shanghai 200062, P. R. China. Fax: 86-21-62233179. Email: [xlzhao@chem.ecnu.edu.cn](mailto:xlzhao@chem.ecnu.edu.cn)*

*The first two authors contributed equally to this work*

*<sup>b</sup> School of Science & Technology, The Open University of Hong Kong, Kowloon, HongKong SAR, P. R. China. Email: [chan@ouhk.edu.hk](mailto:chan@ouhk.edu.hk)*

*<sup>c</sup> State Key Laboratory of Inorganic Synthesis and Preparative Chemistry, College of Chemistry, Jilin University, Changchun 130012, P.R. China*

## Experimental section

### Materials and physical measurements

All chemicals and reagents of analytical grade were commercially available and used without further purification. 5-(4-carboxybenzamido) isophthalic acid ( $H_3L$ ) was synthesized according to the reported method.<sup>1</sup>

The IR spectra were recorded on a Bruker TENSOR 27 spectrometer in the 500-4000 $cm^{-1}$  range. Thermogravimetric Analyses (TGA) was carried out on a Netzsch STA 449 F3 instrument with a heating rate of 10  $^{\circ}C\ min^{-1}$  under  $N_2$  atmosphere. Powder X-ray diffraction (PXRD) data were recorded using a Rigaku (D/Max-Ultima IV) diffractometer equipped with Cu- $K\alpha$  radiation, with a step size and a scan speed of 0.02 $^{\circ}$  and 5 $^{\circ}min^{-1}$ , respectively. Simulated PXRD patterns were calculated with the Mercury program using the single crystal data. Scanning electron microscope energy-disperse X-ray spectroscopy (SEM-EDS) was conducted on a HITACHI S-4800 scanning electron microscope. Solid state photoluminescence spectra of complexes **1-Zn**, **1-Cu** and free  $H_3L$  ligand were measured on a Varian Cary Eclipse fluorescence spectrometer.

### Synthesis of $[Zn_3L_2(DMF)_2]\cdot 2DMF$ (**1-Zn**)

A mixture of  $H_3L$  (16.1 mg, 0.04 mmol) and  $Zn(NO_3)_2\cdot 6H_2O$  (18.6 mg, 0.063 mmol) in 4 mL DMF/ $H_2O$  ( $v = 1:1$ ) was sealed in a Teflon-lined stainless autoclave and heated at 80  $^{\circ}C$  under autogeneous pressure for 48 h, and then cooled to room temperature (cooling rate 0.1  $^{\circ}C\cdot\ min^{-1}$ ). Colorless block crystals were isolated in 85%

yield (based on H<sub>3</sub>L). IR(cm<sup>-1</sup>): 2817(m), 2773(m), 2729(w), 1804(w), 1766(s), 1708(s), 1691(s), 1651(s), 1622(m), 1597(s), 1550(m), 1439(m), 1400(m), 1363(m), 1218(m), 1174(w), 1016(m), 945(s), 882(s), 800(m), 727(s), 633(s).

### Synthesis of **1-Cu**

To obtain the Cu<sup>2+</sup>-exchanged framework of [Zn<sub>3</sub>L<sub>2</sub>(DMF)<sub>2</sub>] $\cdot$ 2DMF, single crystals of the parent complex [Zn<sub>3</sub>L<sub>2</sub>(DMF)<sub>2</sub>] $\cdot$ 2DMF were soaked in a DMF/H<sub>2</sub>O (*v:v* = 1:1) solution of Cu(NO<sub>3</sub>)<sub>2</sub> $\cdot$ 3H<sub>2</sub>O (0.2mol/L) for 5 days. After decanting the solution, the Cu<sup>2+</sup>-exchanged crystals were washed thoroughly with DMF/H<sub>2</sub>O and then soaked in fresh DMF at room temperature for ten days in order to remove the excess metal salt within the pores during which the DMF was replaced six times. For SEM-EDS analysis, the crystals were dried under vacuum. SEM-EDS analysis revealed that the framework Zn<sup>2+</sup> could be completely exchanged by Cu<sup>2+</sup>, resulting in **1-Cu**. The reverse ion exchange was also investigated by soaking the fully exchanged **1-Cu** in a DMF/H<sub>2</sub>O solution of Zn(NO<sub>3</sub>)<sub>2</sub> $\cdot$ 6H<sub>2</sub>O (0.4M) for six months. SEM-EDS and ICP-AES analysis revealed that no copper ions could be exchanged by Zn<sup>2+</sup>, indicating the single-crystal to single-crystal process is irreversible.

## X-ray Crystallography

Selected crystals were used for data-collection on a Bruker SMART ApexII diffractometer equipped with graphite-monochromatic Mo- $K\alpha$  radiation ( $\lambda = 0.71073$  Å) at room temperature. Frames were collected at  $0.5^\circ$  intervals in  $\varphi$  and  $\omega$  for 10s per frame such that a hemisphere of data was collected. Raw data collection and refinement were done using SMART. Data reduction was performed using SAINT+. Absorption corrections were applied using the SADABS program.<sup>2</sup> All the structures were solved using direct methods and then refined by full-matrix least-squares on  $F^2$  with anisotropic displacement using SHELX-97.<sup>3</sup> Non-hydrogen atoms were refined with anisotropic displacement parameters during the final cycles. All the hydrogen atoms attached to carbon atoms were placed in calculated positions and refined using a riding model.

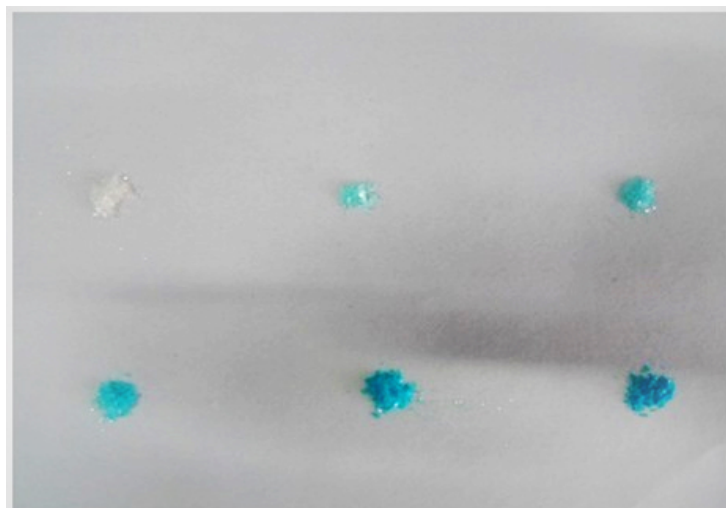

Fig. S1 Photographs of the ion exchange process showing the visual color change during the crystal-to-crystal transformation in five days (From left to right, the first row: origin crystal, the first day and the second day; the second row: from the third day to the fifth day).

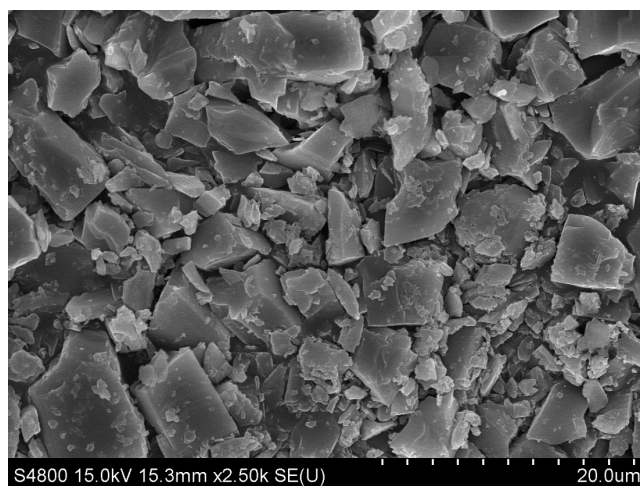

Fig. S2 SEM of complex **1-Zn**.

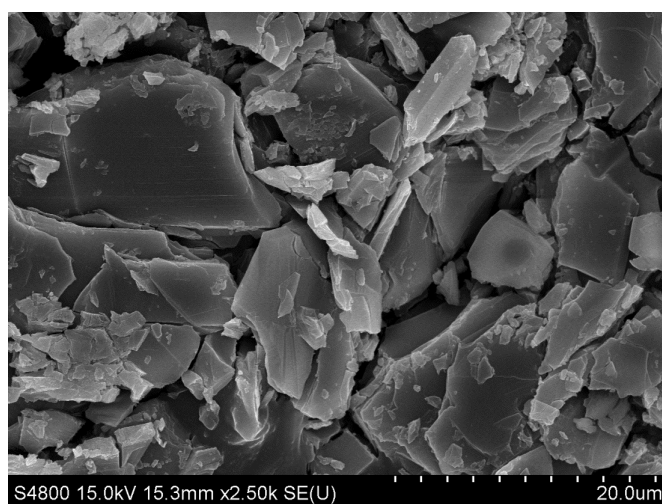

Fig. S3 SEM of complex **1-Cu**.

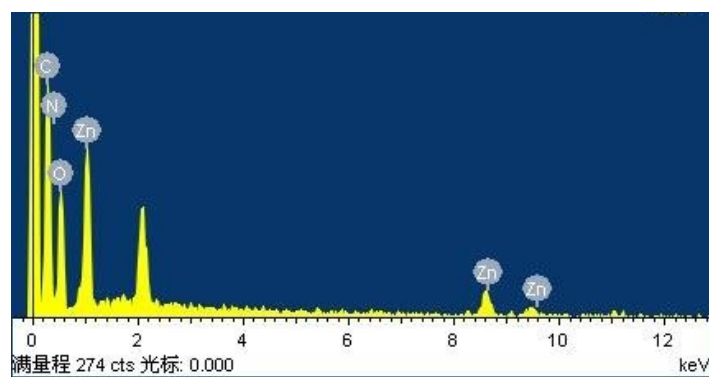

(a)

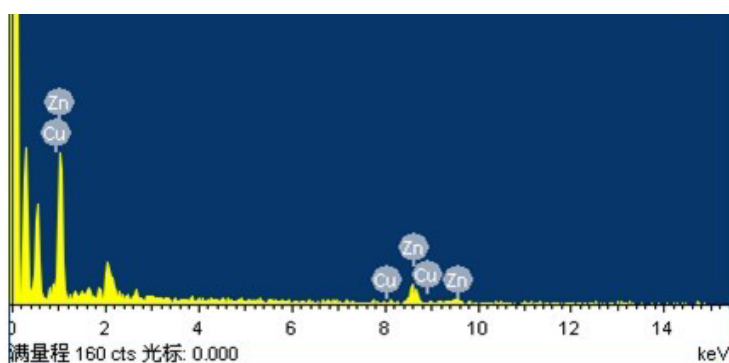

(b)

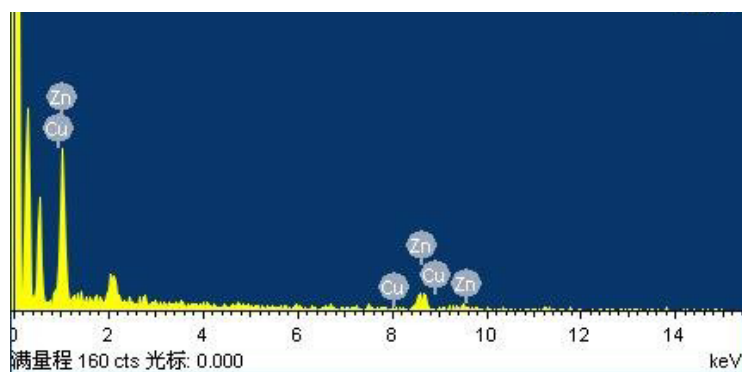

(c)

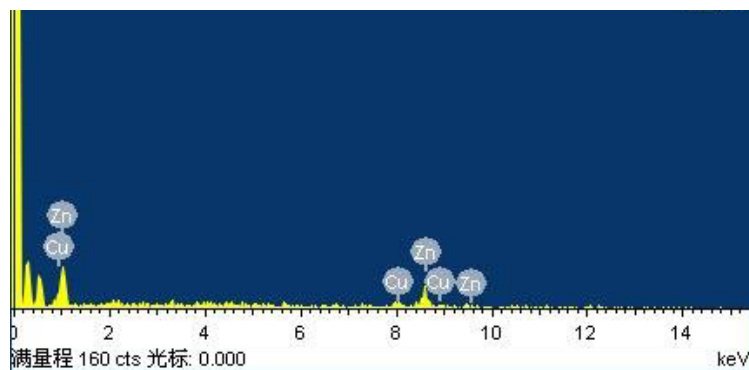

(d)

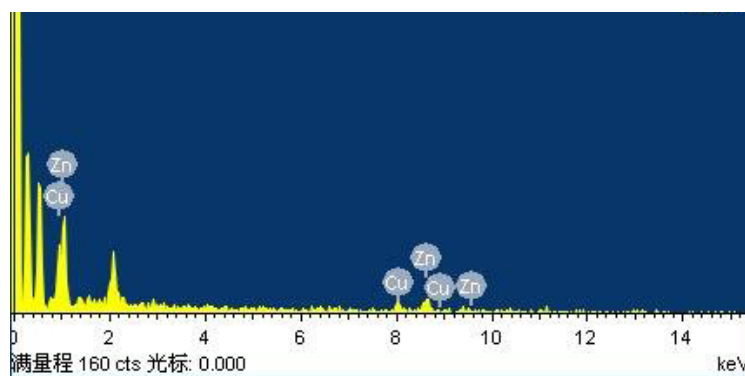

(e)

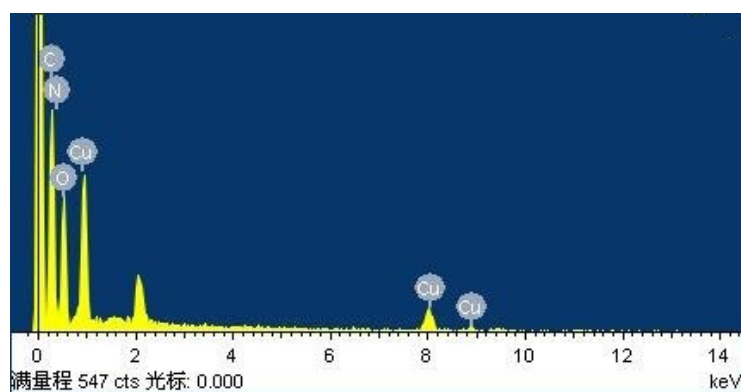

(f)

Fig. S4 EDS tests before and after the single-crystal-to-single-crystal transformation process: (a) Complex **1-Zn** (before metal ion-exchange); metal ion exchanged on: (b) the first day; (c) the second day; (d) the third day; (e) the fourth day; (f) the fifth day (**1-Cu**).



**Table S1 Metal ion ratio during the ion exchange process monitored by ICP-AES**

| Sample                                                                                                             | Time                                                                                               | Metal molar ratio (%) |    |
|--------------------------------------------------------------------------------------------------------------------|----------------------------------------------------------------------------------------------------|-----------------------|----|
|                                                                                                                    |                                                                                                    | Zn                    | Cu |
| 1-Zn soaked in DMF/H <sub>2</sub> O<br>solution of<br>Cu(NO <sub>3</sub> ) <sub>2</sub> ·3H <sub>2</sub> O (0.2 M) | 0 h                                                                                                | 100                   | 0  |
|                                                                                                                    | 8 h                                                                                                | 85                    | 15 |
|                                                                                                                    | 12 h                                                                                               | 78                    | 22 |
|                                                                                                                    | 24 h                                                                                               | 55                    | 45 |
|                                                                                                                    | 32 h                                                                                               | 38                    | 62 |
|                                                                                                                    | 36 h                                                                                               | 35                    | 65 |
|                                                                                                                    | 56 h                                                                                               | 25                    | 75 |
|                                                                                                                    | 96 h                                                                                               | 11                    | 89 |
|                                                                                                                    | 5 days                                                                                             | 3                     | 97 |
|                                                                                                                    | 21 days                                                                                            | 1                     | 99 |
|                                                                                                                    | 1-Zn soaked in DMF/H <sub>2</sub> O<br>solution of<br>CuCl <sub>2</sub> ·4H <sub>2</sub> O (0.2 M) | 12 days               | 2  |

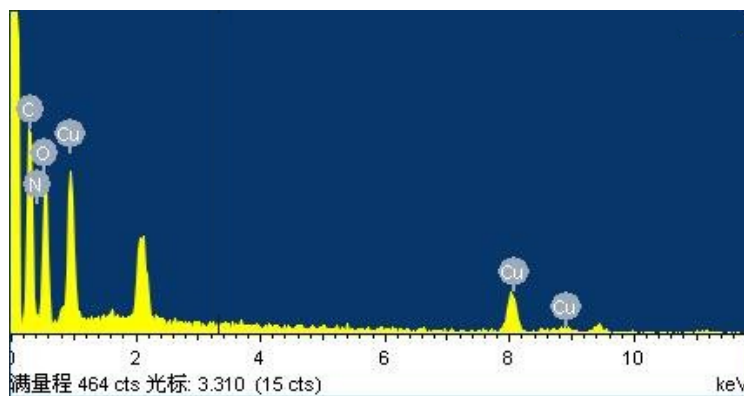

(a)

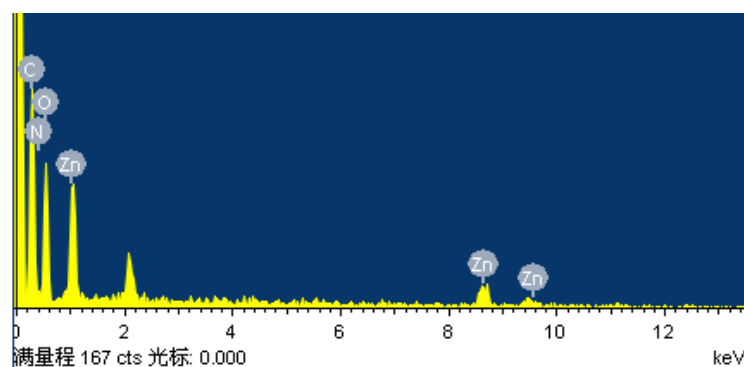

(b)

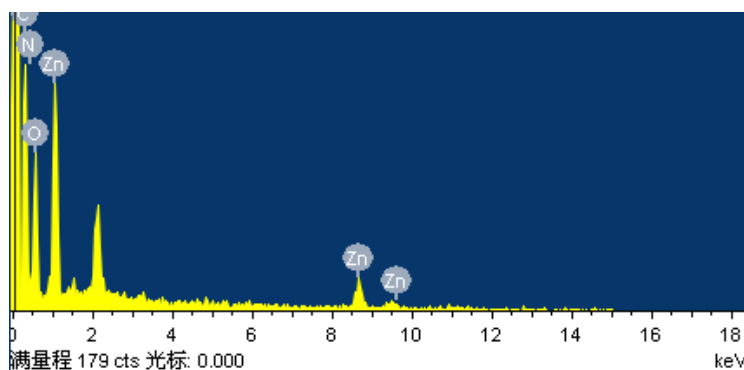

(c)

Fig. S5 (a) EDS of complex **1-Cu** in a concentrated DMF/H<sub>2</sub>O solution containing Zn(NO<sub>3</sub>)<sub>2</sub>·6H<sub>2</sub>O (0.4 M) after 6 months; (b) EDS of complex **1-Zn** in a concentrated DMF/H<sub>2</sub>O solution containing Ni(NO<sub>3</sub>)<sub>2</sub>·6H<sub>2</sub>O (0.2 M) under 80 °C after 36 h; (c) EDS of complex **1-Zn** in a concentrated DMF/H<sub>2</sub>O solution containing Co(NO<sub>3</sub>)<sub>2</sub>·6H<sub>2</sub>O after under 80 °C after 36 h.

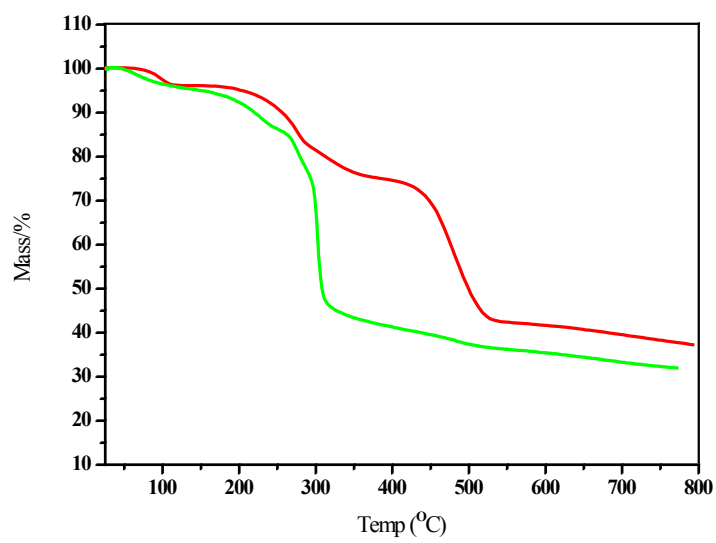

Fig. S6 TGA curves of  $[\text{Zn}_3\text{L}_2(\text{DMF})_2]\cdot 2\text{DMF}$  (**1-Zn**, red) and **1-Cu** (green).

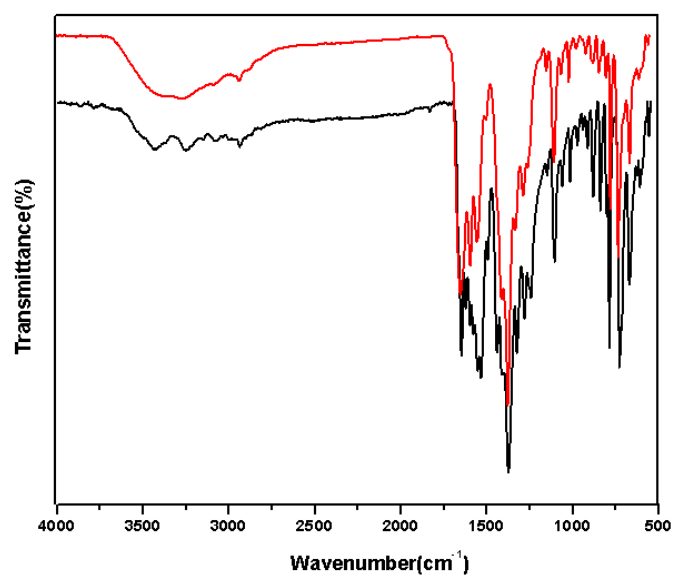

Fig. S7 FT-IR spectra of **1-Zn** (black), **1-Cu** (red).

## References

1. J. G. Duan, Z. Yang, J. F. Bai, B. S. Zheng, Y. Z. Li and S. H. Li, *Chem. Commun.*, 2012, **48**, 3058.
2. (a) SMART, Version 5.05; Bruker AXS, Inc.: Madison, WI, 1998; (b) SAINT-Plus, Version 7.03; Bruker AXS Inc.: Madison, Wisconsin, 2004; (c) G. M. Sheldrick, SADABS (Version 2.03) and TWINABS (Version 1.02), University of Göttingen, Germany, 2002.
3. G. M. Sheldrick, *SHELXS-97*; University of Göttingen: Germany, 1997.
